# Supplementary material for: Evaluation of In Vitro and In Silico Anti-Alzheimer Potential of Nonpolar Extracts and Essential Oil from Mentha piperita
Source: MDPI journal article supplement (doi:10.3390/foods12010190), 2023-01-01
Supplement: s1 [file s1]

**Table S1.** Chemical composition, retention indices, and percentage composition of essential oil of *Mentha piperita*.

| Pic | Compound <sup>a</sup>                                                                                                                         | TR     | RI <sup>b</sup> | (%)   |
|-----|-----------------------------------------------------------------------------------------------------------------------------------------------|--------|-----------------|-------|
| 1   | Dichotine, 19-hydroxy-11-methoxy-, triacetate (ester)                                                                                         | 3.782  | 4188            | 0.005 |
| 2   | 2(1H)-Pyridinone, 1,3,4,5,6-pentamethyl-                                                                                                      | 4.508  | 1363            | 0.009 |
| 3   | Butanamide, N-(5,6,7,9-tetrahydro-1,2,3,10-tetramethyloxy-9-oxobenzo(a)heptalen-7-yl)-, (S)-                                                  | 5.051  | 3455            | 0.008 |
| 4   | syn-4,7,14,17-Tetrachloro[2.2](5,8)phthalazinophane                                                                                           | 5.868  | 3456            | 0.009 |
| 5   | [1,1'-Bianthracene]-9,9',10,10'-tetrone, 2,2',4,4',5,5',8-heptahydroxy-7,7'-dimethyl-                                                         | 6.148  | 5689            | 0.007 |
| 6   | Triimidazo[1,5-a:1',5'-c:1'',5''-e][1,3,5]triazine-1,5,9(2H,6H,10H)-trione, 2,6,10-tris(1,1-dimethylethyl)hexahydro-3,3,7,7,11,11-hexamethyl- | 6.474  | 3545            | 0.013 |
| 7   | Dibenzo(a,f)cyclopropa(cd)pentalene, 1,2,3,4-tetrachloro-4b,8b,8c,8d-tetrahydro-                                                              | 7.308  | 2852            | 0.012 |
| 8   | $\alpha$ -Pinene                                                                                                                              | 8.211  | 931             | 0.516 |
| 9   | Isoxazol, 4-bromo-3-phenyl-5-[(5'-morpholino-3'-phenyl)isoxazol-4'-yl]-                                                                       | 8.417  | 3444            | 0.006 |
| 10  | 2-Pentenedinitrile                                                                                                                            | 9.126  | 1239            | 0.045 |
| 11  | N,N'-[6-Methylpyrido[3,2-d]pyrimidine-2,4-diyl]bisbenzamide                                                                                   | 10.532 | 3699            | 0.086 |
| 12  | Lanostan-18-oic acid, 3 $\beta$ ,11 $\beta$ -dihydroxy-, $\gamma$ -lactone, acetate                                                           | 10.652 | 3240            | 0.006 |
| 13  | Tricyclene                                                                                                                                    | 10.806 | 922             | 0.245 |
| 14  | 5-Azabicyclo[2.2.0]hex-2-en-6-one                                                                                                             | 11.583 | 767             | 0.069 |
| 15  | 2-Methyl-1,4-pentadiene                                                                                                                       | 11.629 | 580             | 0,073 |
| 16  | (E)-2-Heptenal                                                                                                                                | 12.549 | 942             | 0.018 |
| 17  | Oxirane, 2-(chloromethyl)-2-(1,1-dimethylethyl)-                                                                                              | 12.629 | 922             | 0.079 |
| 18  | Imidazo(1,5-a)pyrimidine                                                                                                                      | 14.012 | 1066            | 0,065 |
| 19  | Chloromethyl 5-chloropentanoate                                                                                                               | 14.064 | 1648            | 0.019 |
| 20  | DL-Limonene                                                                                                                                   | 14.241 | 1026            | 0.549 |
| 21  | Camphene                                                                                                                                      | 14.327 | 943             | 0.130 |
| 22  | 1,8-Cineole                                                                                                                                   | 14.778 | 1023            | 9.643 |
| 23  | Sarcosine, N-(cyclopentylcarbonyl)-, pentadecyl ester                                                                                         | 16.276 | 2818            | 0.021 |
| 24  | Thiourea, N-phenyl-N'-(2-phenylethyl)-                                                                                                        | 16.304 | 2449            | 0.019 |
| 25  | Benzisoxazole-2-acetic acid, hydrazide                                                                                                        | 17.522 | 1888            | 0.298 |
| 26  | (3-Oxo-3H-benzo[f]chromen-1-yl)-acetic acid ethyl ester                                                                                       | 19.374 | 2480            | 0.009 |
| 27  | Brocresine                                                                                                                                    | 19.734 | 1653            | 0.103 |
| 28  | Pyrazophos                                                                                                                                    | 19.859 | 2569.1          | 0.083 |

|    |                                                                                  |        |       |        |
|----|----------------------------------------------------------------------------------|--------|-------|--------|
| 29 | Tricyclo[3.2.2.0]nonane-2-carboxylic acid                                        | 19.905 | 1326  | 0.065  |
| 30 | Phenyl 5-methoxypentanoate                                                       | 19.985 | 1534  | 0.025  |
| 31 | Cyclohex-2-enone, 3-(2H-tetrazol-5-ylamino)-                                     | 20.048 | 2329  | 0.049  |
| 32 | <i>p</i> -Nitrophenylhydrazine                                                   | 20.151 | 1531  | 0.117  |
| 33 | Myrcene                                                                          | 20.202 | 979   | 0.100  |
| 34 | 2-Propanone, 1-phenyl-, oxime                                                    | 21.157 | 1325  | 0.013  |
| 35 | Carbonic acid, chloromethyl (4-methylphenyl) diester                             | 21.203 | 1475  | 0.008  |
| 36 | Acetic acid, 17-(4-chloro-5-methoxy-1,5-dimethylhexyl)-4,4,10,13,14-pentamethyl- | 21.231 | 3268  | 0.012  |
| 37 | <i>p</i> -Toluenesulfonyl-tyrosyl-S-methylcysteine, ethyl ester                  | 21.311 | 3991  | 0.045  |
| 38 | 4-Hydroxyadamantan-2-one                                                         | 21.700 | 1240  | 0.024  |
| 39 | 2,8-Decadiyne                                                                    | 21.894 | 1050  | 0.031  |
| 40 | Furfurylideniminosulphur pentafluoride                                           | 21.940 | 966   | 0.016  |
| 41 | Nortricyclen                                                                     | 22.014 | 857   | 0.019  |
| 42 | 2,4-Hexadien-1-ol                                                                | 22.460 | 916   | 0.017  |
| 43 | 2,4,6-Cycloheptatrien-1-one, 2,3-dimethyl-                                       | 22.614 | 1136  | 0.050  |
| 44 | 5,6,7-Trinitro-1,4-benzodioxane                                                  | 23.020 | 2331  | 0.180  |
| 45 | Furazan-3-amine, 4-(1,2,4-triazol-3-yl)-                                         | 23.106 | 1690  | 0.288  |
| 46 | <i>p</i> -Menthone                                                               | 23.706 | 1133  | 0.218  |
| 47 | Isomenthon                                                                       | 23.866 | 1146  | 43.762 |
| 48 | 4-Hexen-2-one, 3-methyl-                                                         | 23.986 | 797   | 0.078  |
| 49 | <i>endo</i> -Borneol                                                             | 25.472 | 1148  | 0.259  |
| 50 | 1-(1-Butyny)cyclopentanol                                                        | 25.621 | 1127  | 0.561  |
| 51 | Terpinen-4-ol                                                                    | 25.792 | 1161  | 0.340  |
| 52 | Pyridine, 2,4-dimethyl-                                                          | 26.695 | 903.9 | 0.173  |
| 53 | Benzeneethanamine                                                                | 27.461 | 1136  | 0.044  |
| 54 | 2,3-Diformylphenol                                                               | 27.827 | 1504  | 0.060  |
| 55 | 2-Methylenebicyclo[2.2.1]-heptane                                                | 27.918 | 808   | 0.040  |
| 56 | 2-Butene, 1-chloro-4-ethoxy-                                                     | 27.981 | 927   | 0.041  |
| 57 | Dansyl-L-methionine                                                              | 28.238 | 3252  | 0.158  |
| 58 | 7,8-Dioxabicyclo(4,2,2)dec-9-ene                                                 | 28.358 | 1061  | 0.074  |
| 59 | 2-Pyrazolin-3-amine, N-(3,5-dichloro-2-methoxybenzylidene)-1-phenyl-             | 28.713 | 2833  | 0.013  |
| 60 | Tetrazolo[1,5-a]pyrimidine, 5,7-dimethyl-                                        | 29.250 | 1636  | 0.027  |
| 61 | Pulegone                                                                         | 30.359 | 1216  | 21.610 |

|    |                                                                                          |        |        |       |
|----|------------------------------------------------------------------------------------------|--------|--------|-------|
| 62 | <i>cis</i> -Piperitone oxide                                                             | 31.187 | 1230   | 3.771 |
| 63 | Piperitone                                                                               | 31.376 | 1228   | 1.083 |
| 64 | Hexan-1,6-diol, O,O'-bis[4-aminophenyl]-                                                 | 31.673 | 2739   | 0.054 |
| 65 | (1R,2R,8aS)-2,4,4,7a-Tetramethyl-1-(3-oxobutyl)-trans-hydrindan-2-carboxylic acid        | 32.188 | 2176   | 0.047 |
| 66 | 2-Amino-4,6-bis(3-pyridyl)-1,3,5-triazine                                                | 32.336 | 2335   | 0.082 |
| 67 | 2,3-Dimethoxybenzamide                                                                   | 32.588 | 1581   | 0.062 |
| 68 | Benzene, 1-methoxy-4-methyl-2-[[[2-(4-nitrophenyl)hydrazino]carbonyl]amino]-             | 32.942 | 2962   | 0.049 |
| 69 | 3-Methylenecyclohexene                                                                   | 33.388 | 768    | 0.103 |
| 70 | 3-Methyl-2-nitrophenol                                                                   | 33.657 | 1410   | 0.081 |
| 71 | Carvacrol                                                                                | 34.280 | 1278   | 0.424 |
| 72 | 2,4,6-Trimethyl-1,3-phenylenediamine                                                     | 34.508 | 1318   | 0.092 |
| 73 | 1H-Pyrido(4,3-b)indole, 2,3,4,5-tetrahydro-2-cyclohexyl-5-(2-(6-methyl-3-pyridyl)ethyl)- | 35.057 | 3133   | 0.025 |
| 74 | 2-Isopropylidene-3-methylhexa-3,5-dienal                                                 | 36.777 | 1141   | 1.368 |
| 75 | Sarcosine, N-(cyclohexylcarbonyl)-, tetradecyl ester                                     | 37.692 | 1845   | 0.082 |
| 76 | Benzene, 1-methyl-4-(methylthio)-                                                        | 38.252 | 1158   | 1.568 |
| 77 | 2,4-Cyclopentadiene-1-ethanamine                                                         | 38.606 | 967    | 0.146 |
| 78 | 1-Pentyne, 3-methoxy-3-methyl-                                                           | 38.823 | 706    | 0.221 |
| 79 | 1-Phenyl-2-[4-(2-phenyloxazol-5-yl)phenyl]ethyne                                         | 39.109 | 2820   | 0.059 |
| 80 | 2,3-Disila-2,2,3,3,6,10-hexamethylundeca-5,9-diene, 4-(phenylthio)-                      | 39.503 | 2162   | 0.076 |
| 81 | Zymosterol                                                                               | 40.195 | 2674   | 0.089 |
| 82 | Ylangene                                                                                 | 40.887 | 1372   | 0.403 |
| 83 | <i>m</i> -Toluamide                                                                      | 41.487 | 1316   | 0.095 |
| 84 | Alloaromadendrene                                                                        | 42.058 | 1490   | 0.369 |
| 85 | 2-Methoxy-5-nitrophenol, heptafluorobutyrate                                             | 42.807 | 1401   | 0.063 |
| 86 | 2-Bornanone oxime                                                                        | 43.150 | 1282   | 0.128 |
| 87 | 5,6,7-Trinitro-1,4-benzodioxane                                                          | 43.367 | 2331   | 0.266 |
| 88 | Androstan-17-one, 3-methoxy-16,16-dimethyl-, (3 $\beta$ ,5 $\alpha$ )-                   | 44.047 | 2212   | 0.068 |
| 89 | Germacrene-d                                                                             | 44.785 | 1480   | 0.519 |
| 90 | Benzamide, 4-chloro-N-(2,4-dimethoxyphenyl)-                                             | 46.362 | 2425   | 0.039 |
| 91 | 5,5-Dimethyl-2-phenyl-1,3-oxazin-4-one                                                   | 46.756 | 1698   | 0.102 |
| 92 | Benzene, 1,2-diethyl-                                                                    | 47.036 | 1067   | 0.086 |
| 93 | Benzotrichloride                                                                         | 47.254 | 1187.4 | 0.080 |

|                     |                                                                                                         |        |      |        |
|---------------------|---------------------------------------------------------------------------------------------------------|--------|------|--------|
| 94                  | 4-Pentenal, 2-methylene-                                                                                | 49.105 | 763  | 0.088  |
| 95                  | Naphthalene, decahydro-4a-methyl-1-methylene-7-(1-methylethenyl)-, [4aR-(4a $\alpha$ ,7a,8a $\beta$ )]- | 49.848 | 1478 | 0.109  |
| 96                  | 4-Normethyl-9,19-cyclolanoststan-7-one, 3-acetoxy-                                                      | 50.071 | 3005 | 0.143  |
| 97                  | Spathulenol                                                                                             | 50.946 | 1569 | 1.849  |
| 98                  | Ledene                                                                                                  | 51.334 | 1520 | 0.531  |
| 99                  | 2-Trimethylstannyl-5-trichloromethyl-6-chlorobicyclo[2.2.1]heptane                                      | 51.757 | 1935 | 0.319  |
| 100                 | 2,4,6(1H,3H,5H)-Pyrimidinetrione, 5-ethyl-5-phenyl-(CAS)                                                | 52.272 | 1849 | 0.089  |
| 101                 | 1-Cyclooctene                                                                                           | 52.632 | 888  | 0.169  |
| 102                 | 2-Methyl-4-hydroxybenzoxazole                                                                           | 53.426 | 1366 | 0.099  |
| 103                 | (+)- <i>epi</i> -Bicyclosesquiphellandrene                                                              | 54.569 | 1435 | 0.480  |
| 104                 | 5-But-2-enyl-4-methyl-2,3-dihydrothiophene 1,1-dioxide                                                  | 54.964 | 1561 | 0.049  |
| 105                 | 3,4-Pyridinedicarboxylic acid                                                                           | 55.301 | 1613 | 0.459  |
| 106                 | 1-Phenyl-5-amino-1,2-pyrazole                                                                           | 55.604 | 1522 | 0.102  |
| 107                 | 2-Cyclopenten-1-one, 3-methyl-2-(2-pentenyl)-, (Z)-                                                     | 57.073 | 1395 | 0.315  |
| 108                 | Benzaldehyde, 4-diethylamino-, 3,4-dimethylphenoxyacetyl hydrazone                                      | 57.359 | 3044 | 0.110  |
| 109                 | Cyclotridecanone                                                                                        | 65.172 | 1730 | 0.282  |
| 110                 | Isoxazole-4-carboxamide, 3-(2-chlorophenyl)-N-(2-methoxybenzyl)-                                        | 68.561 | 2885 | 0.059  |
| 111                 | 7H-1,2,3-Triazolo[4,5-d]pyrimidin-7-one, 2,6-dihydro-2-(4-methoxyphenyl)-                               | 72.213 | 2138 | 0.112  |
| 112                 | Trifluoroperazine                                                                                       | 79.255 | 2688 | 0.046  |
| 113                 | Cyclobutene, 1-cyano-2,3,3-trifluoro-                                                                   | 80.598 | 641  | 0.049  |
| Total compounds (%) |                                                                                                         | Total  |      | 97.821 |

<sup>a</sup>Compounds listed according to RI

<sup>b</sup>RI (from literature)

**Table S2.** Chemical composition, retention indices, and percentage composition of petroleum ether extract of *Mentha piperita*

| Pic | Compound <sup>a</sup>                                                                                       | TR    | RI <sup>b</sup> | (%)   |
|-----|-------------------------------------------------------------------------------------------------------------|-------|-----------------|-------|
| 1   | 9-(4-Hydroxy-benzylidene)-4-methyl-2H-furo[2,3-h]chromene-2,8(9H)-dione                                     | 4.442 | 3033            | 0.034 |
| 2   | 4- <i>n</i> -Butyl-3-[ <i>n</i> -octylsulfonyl]nitrobenzene                                                 | 4.830 | 2803            | 0.107 |
| 3   | 1-Phenyleicosane                                                                                            | 5.225 | 2682            | 0.101 |
| 4   | 2,5,8,11,14,20,23,26,29,32 Decaoxatricyclo [31.3.1.1(15,19)] octatriaconta-1(37),15,17,19(38),33,35-hexaene | 5.288 | 4381            | 0.055 |
| 4   | 5-(2-Aminoethyl)-1,3-benzodioxole                                                                           | 6.105 | 1460            | 0.062 |
| 5   | Acetic acid, bromo-, methyl ester                                                                           | 6.739 | 793             | 0.047 |

|    |                                                                                  |        |        |        |
|----|----------------------------------------------------------------------------------|--------|--------|--------|
| 6  | 1-(3,5-Dimethyl-1-adamantanoyl)semicarbazide                                     | 7.059  | 2208   | 0.228  |
| 7  | 2,4-Dimethoxyphenol                                                              | 7.157  | 1318.6 | 0.558  |
| 8  | Cyclopropane, 1,1'-ethenylidenebis-                                              | 7.900  | 788    | 0.448  |
| 9  | N,N'-(1,5-Naphthalene)bis(2-isopentyl-1-cyclopropanecarboxamide)                 | 8.448  | 3648   | 0.090  |
| 10 | Acetylcodeine                                                                    | 8.814  | 2480   | 0.168  |
| 11 | 2-Methyl-2-butenenitrile                                                         | 9.157  | 749    | 0.094  |
| 12 | Piperonyl alcohol                                                                | 9.271  | 1380   | 0.128  |
| 13 | Isomenthon                                                                       | 9.374  | 1146   | 0.485  |
| 14 | l-Menthone                                                                       | 9.569  | 1148   | 10.957 |
| 15 | <i>cis</i> -Z-.alpha.-Bisabolene epoxide                                         | 9.706  | 1531   | 0.324  |
| 16 | 1-[13C]-Phenylethylamine                                                         | 10.026 | 1069.9 | 0.155  |
| 17 | Methyl undecyl ether                                                             | 10.369 | 1318   | 0.439  |
| 18 | Pulegone                                                                         | 10.700 | 1216   | 4.636  |
| 19 | 3-Hexene, 3-ethyl-2,5-dimethyl-                                                  | 10.883 | 872    | 1.813  |
| 20 | 6-Methyl-2H-pyran-2-one                                                          | 10.957 | 937    | 0.317  |
| 21 | 4-Pyrrolidin-1-yl-1,5-dihydro-imidazol-2-one                                     | 11.072 | 1365   | 0.131  |
| 22 | 2,4-Dimethoxyaniline                                                             | 11.455 | 1370   | 0.439  |
| 23 | Diphosphoramidate, octamethyl-                                                   | 11.540 | 1816.3 | 0.257  |
| 24 | Carbamic acid, N-(4-chlorophenyl)-, 4-nitrophenyl ester                          | 11.695 | 2408   | 0.224  |
| 25 | Triethylene glycol monochloride                                                  | 11.786 | 1237   | 0.052  |
| 26 | Pyrazine, methoxy-, 4-oxide                                                      | 11.952 | 1470   | 0.397  |
| 27 | 3-(3-Fluoro-4-methoxyphenyl)-5-[4-(4-propylcyclohexyl)-phenyl]-[1,2,4]oxadiazole | 12.038 | 3052   | 0.085  |
| 28 | 2,4-Cycloheptadien-1-one, 2,6,6-trimethyl-                                       | 12.478 | 1222.7 | 0.640  |
| 29 | Piperitenone oxide                                                               | 12.478 | 1363   | 1.444  |
| 30 | Ergost-5-enol                                                                    | 12.649 | 2632   | 0.142  |
| 31 | 7-Azatricyclo[4.2.2.0(2,5)]deca-3,7,9-triene, 8-methoxy-, exo-                   | 13.404 | 1030   | 0.116  |
| 32 | (2E)-3-Methyl-2-penten-4-yn-1-ol                                                 | 13.524 | 843    | 0.486  |
| 33 | 2-Azatricyclo[4.3.1.1(4,8)]undecane                                              | 13.689 | 1269   | 0.095  |
| 34 | (7S,8R,S)-7-Hydroxymethyl-8-ethoxy-cis-bicyclo[4.3.0]-3-nonene                   | 13.952 | 1504   | 0.133  |
| 35 | Methoxypyrazine                                                                  | 14.421 | 877    | 0.357  |
| 36 | 10-Nitro-3,8,13,18-tetraethyl-2,7,12,17-tetramethyl-21H,23H-porphine             | 14.827 | 4247   | 0.193  |
| 37 | Pyridine-4-carbohydrazide, N2-(2-hydroxy-5-methoxybenzylideno)-                  | 14.918 | 2586   | 0.099  |

|    |                                                                                                                                      |        |       |        |
|----|--------------------------------------------------------------------------------------------------------------------------------------|--------|-------|--------|
| 38 | Oxazol-2-thione[4,5-o]ergost-7,22-dien-3-ol, acetate(ester)                                                                          | 15.038 | 3497  | 0.038  |
| 39 | 1H-Cycloprop[e]azulen-7-ol, decahydro-1,1,7-trimethyl-4-methylene-, [1ar-(1α,4α,7β,7aβ,7bα)]-                                        | 15.227 | 1569  | 0.565  |
| 40 | Tricyclo[5.2.1.0(2,6)]decane                                                                                                         | 15.290 | 1078  | 0.339  |
| 41 | Campesterol                                                                                                                          | 15.438 | 3276  | 0.120  |
| 42 | Rheadan-8-ol, 2,3,10,11-tetramethoxy-16-methyl-, (6α,8α)-                                                                            | 15.684 | 3039  | 0.272  |
| 43 | Ethanone, 1-(3-cyclohexen-1-yl)-                                                                                                     | 16.147 | 858   | 0.097  |
| 44 | 5α-Androstan-17β-ol, 2α,3α-epoxy-3-methyl-                                                                                           | 16.353 | 2042  | 0.064  |
| 45 | Indolo[1,7a,7-ab]benzazepin-1-one, 4,12a-etheno-3,4,6,7,12,12a(1H)-hexahydro-                                                        | 16.581 | 2105  | 0.275  |
| 46 | 1,3-Benzenediamine, N,N'-bis(sulfinyl)-                                                                                              | 16.656 | 1630  | 0.071  |
| 47 | Ppropanesulfonic acid, 3-iodo-, phenyl ester                                                                                         | 16.879 | 1989  | 0.130  |
| 48 | Ethoxzolamide                                                                                                                        | 17.513 | 2578  | 0.131  |
| 49 | Isomorellin                                                                                                                          | 17.839 | 4140  | 0.177  |
| 50 | 1,2,4-Cyclopentanetrione, 3,3-bis(3-methyl-2-butenyl)-5-(3-methyl-1-oxobutyl)-                                                       | 17.953 | 3100  | 0.242  |
| 51 | Trichothec-9-en-8-one, 4-(acetyloxy)-12,13-epoxy-3,7,15-trihydroxy-, (3α,4β,7β)-                                                     | 18.285 | 2485  | 0.233  |
| 52 | 6-Phenyl-4-(trifluoromethyl)isothiazolo[5,4-b]pyridin-3(2H)-one                                                                      | 18.393 | 1979  | 0.236  |
| 53 | Methyl palmitate                                                                                                                     | 18.799 | 1908  | 0.270  |
| 54 | Palmitinic acid                                                                                                                      | 19.382 | 1972  | 3.659  |
| 55 | 26,27-Dinorcholesta-5,22-dien-3-ol, (3β,22E)-                                                                                        | 19.668 | 2470  | 0.192  |
| 56 | (4E)-4-Nonen-2-yne                                                                                                                   | 20.159 | 941   | 0.139  |
| 57 | Sarcosine, N-(cyclopentylcarbonyl) -, decyl ester                                                                                    | 20.262 | 2321  | 0.078  |
| 58 | Methyl linoleate                                                                                                                     | 20.445 | 2071  | 0.476  |
| 59 | Methyl 9,12,15-octadecatrienoate                                                                                                     | 20.514 | 2101  | 0.606  |
| 60 | 2,3-trimethylenenorbornane                                                                                                           | 20.719 | 1078  | 0.325  |
| 61 | Linolenic acid                                                                                                                       | 21.228 | 2122  | 25.628 |
| 62 | n-Octadecanoic acid                                                                                                                  | 21.297 | 2174  | 2.268  |
| 63 | Furan, 3-methyl-                                                                                                                     | 21.640 | 602.2 | 0.282  |
| 64 | Distearyl thiodipropionate                                                                                                           | 22.200 | 4781  | 0.679  |
| 65 | Tricyclo[4.3.1.0(2,5)]decane                                                                                                         | 22.794 | 1003  | 0.625  |
| 66 | Cyclohexene, 4-ethenyl-                                                                                                              | 22.914 | 826   | 0.136  |
| 67 | 17-(1,5-Dimethylhexyl)-2,3-dihydroxy-10,13-dimethyl-1,2,3,7,8,9,10,11,12,13,14,15,16,17-tetradecahydrocyclopenta[a]phenanthren-6-one | 23.034 | 2956  | 0.388  |

|    |                                                                                                                                                   |        |        |       |
|----|---------------------------------------------------------------------------------------------------------------------------------------------------|--------|--------|-------|
| 68 | Cholestane, 3-thiocyanato-, (3 $\alpha$ ,5 $\alpha$ )-                                                                                            | 23.371 | 2955   | 0.251 |
| 69 | 3-(7-Acetoxy-4b-methyl-2-oxotetradecahydrophenanthren-1-yl)-propionic acid, methyl ester                                                          | 23.531 | 2582   | 0.189 |
| 70 | 1-Decyl-4(1H)-pyridinimine                                                                                                                        | 23.611 | 1651   | 0.308 |
| 71 | <i>n</i> -Nonadecane                                                                                                                              | 23.834 | 312.43 | 0.963 |
| 72 | Lup-1-en-3-one, (+)-                                                                                                                              | 24.206 | 2782   | 0.299 |
| 73 | 1,4-Bis(p-tolylsulfonyl)-2,3,5,6-tetrafluorobenzene                                                                                               | 24.297 | 3193   | 0.109 |
| 74 | 1,1'-Biphenyl, 2,2',3,3',4,5',6,6'-octachloro-                                                                                                    | 24.434 | 2502   | 0.175 |
| 75 | N-(2,3-Dihydro-1,4-benzodioxin-2-ylmethyl)-2,2,2trifluoroacetamide                                                                                | 24.932 | 1639   | 0.173 |
| 76 | 7-Oxa-15,20,24,27-tetraazatetracyclo[13.9.6.2(8,11).1(2,6)]tritriaconta-2,4,6(33),8,10,12,31-heptaene-14,26-dione, 20-acetyl-5-methoxy-, [s-(Z)]- | 25.069 | 4748   | 0.289 |
| 77 | 3,6-Di(trifluoromethyl)-9-phenanthrylcarbamic acid ethyl ester                                                                                    | 25.155 | 2355   | 0.150 |
| 78 | Tritriacontane (CAS)                                                                                                                              | 25.355 | 500.99 | 0.890 |
| 79 | Pyridine-2,6-dicarboxylic acid, bis-benzothiazol-2-ylamide                                                                                        | 25.863 | 4054   | 0.599 |
| 80 | Tricosane, 2-methyl-                                                                                                                              | 26.069 | 2363   | 0.668 |
| 81 | Pyrido[2,3-d]pyrimidine, 4-phenyl-                                                                                                                | 26.189 | 1900   | 0.265 |
| 82 | 13-Methylheptatriacontane                                                                                                                         | 26.498 | 3733   | 0.578 |
| 83 | Cholestane-3,6,7-triol, (3 $\beta$ ,5 $\alpha$ ,6 $\beta$ ,7 $\beta$ )-                                                                           | 26.612 | 2962   | 0.261 |
| 84 | <i>n</i> -Nonacosane                                                                                                                              | 26.778 | 475.3  | 2.212 |
| 85 | Phosphine, chloro(2,4,6-triisopropylphenyl)(2,4,6-tri- <i>t</i> -butylphenyl)-                                                                    | 27.189 | 3395   | 0.603 |
| 86 | 6-Chloro-3-ethyl-2-methyl-4-phenylquinoline                                                                                                       | 27.384 | 2418   | 0.161 |
| 87 | <i>n</i> -Triacontane                                                                                                                             | 27.452 | 488.4  | 1.021 |
| 88 | Pentanal, 5-hydroxy-, (2,4-dinitrophenyl)hydrazone                                                                                                | 27.927 | 2639   | 1.071 |
| 89 | Hexatriacontane                                                                                                                                   | 28.252 | 3600   | 1.990 |
| 90 | N-(3-Chlorophenyl)maleimide                                                                                                                       | 28.584 | 1827   | 0.240 |
| 91 | ( $\pm$ )- $\alpha$ -Tocopherol acetate                                                                                                           | 28.767 | 3308   | 0.614 |
| 92 | Methoxyacetic acid, 3-tetradecyl ester                                                                                                            | 29.144 | 1890   | 0.708 |
| 93 | Acetamide, N-[2-[[2-[2-(2-nitrophenyl)ethenyl]phenyl]azo]phenyl]-                                                                                 | 29.487 | 3439   | 0.178 |
| 94 | Triacontane, 1-bromo-                                                                                                                             | 29.784 | 3299   | 0.768 |
| 95 | Androst-5-ene-3,7-dione, 4,4-dimethyl-17-trimethylsilyloxy-                                                                                       | 29.910 | 2503   | 0.332 |
| 96 | <i>n</i> -Eicosane                                                                                                                                | 30.253 | 345.2  | 2.946 |
| 97 | Pyrimidine-4,6-dione, hexahydro-1-(3-methoxyphenyl)-5-(2-pyrrolylmethylene)-2-thioxo-                                                             | 30.590 | 3038   | 0.155 |
| 98 | Silanamine, N-[2,6-dimethyl-4-[(trimethylsilyloxy]phenyl]-1,1,1-trimethyl-                                                                        | 30.739 | 1625   | 0.226 |

|                     |                                                                                              |        |        |       |
|---------------------|----------------------------------------------------------------------------------------------|--------|--------|-------|
| 99                  | 8H-Imidazo(2,1-f)purine, 8-methyl-7-phenyl-                                                  | 30.922 | 2155   | 0.740 |
| 100                 | 3-Ketours-12-ene                                                                             | 31.116 | 2856   | 1.141 |
| 101                 | Norpluvine diacetate                                                                         | 31.465 | 2527   | 0.565 |
| 102                 | 2-Pentanone, 3-[(acetyloxy)methyl]-3,4-dimethyl-, (.+.-)-                                    | 31.567 | 1170   | 0.831 |
| 103                 | 5-Methyl-2-phenyl-[1,3]dioxane-5-carboxylic acid (furan-2-ylmethyl)-amide                    | 31.790 | 2488   | 0.717 |
| 104                 | 17-Isoprogesterone                                                                           | 32.270 | 2247   | 1.259 |
| 105                 | 2-Amino-1,1-dicarboxylic acid, N-[3-fluorophenyl]-                                           | 32.973 | 1982   | 0.617 |
| 106                 | 3-Pyrroline-3-carboxylic acid, 2-(4-bromophenyl)-4-hydroxy-5-oxo-1-phenyl-, tert-butyl ester | 33.922 | 3130   | 0.618 |
| 107                 | Isobenzofuran-1,3-dione, 4,5-dimethoxy-                                                      | 34.305 | 1822   | 0.253 |
| 108                 | 2-Methyl-3-chloro-6,7-diphenylimidazo[1,2-b]-1,2,4-triazine                                  | 34.528 | 2686   | 0.108 |
| 109                 | 3-Amino-2-phenazinol ditms                                                                   | 34.888 | 2488   | 0.044 |
| 110                 | Silane, [[[5 $\alpha$ ,11 $\beta$ ]-androsta-2,16-diene-11,17-diyl]bis(oxy)]bis[trimethyl-   | 35.134 | 2253   | 0.192 |
| 111                 | Piperidine, 1-[2-(4-chlorophenyl)-3-(dimethylamino)-1-thioxo-2-propenyl]-                    | 35.625 | 2503   | 0.264 |
| 112                 | 2-Isopropyl-5-methylphenyl 2,2,3,3,3-pentafluoropropanoate                                   | 37.146 | 1216   | 0.451 |
| 113                 | 2,3,4,5,6-Pentachloroaniline                                                                 | 37.500 | 1809.5 | 0.155 |
| 114                 | Heptasiloxane, hexadecamethyl-                                                               | 37.974 | 1437   | 0.448 |
| 115                 | Cyclodecasiloxane, eicosamethyl-                                                             | 38.986 | 2067   | 0.286 |
| 116                 | Bis[4-[3-methoxypropylamino]-3-aminophenyl]sulfone                                           | 39.855 | 3869   | 0.162 |
| 117                 | Baccharan-3 $\beta$ -ol                                                                      | 40.895 | 2853   | 0.602 |
| 118                 | Benzoic acid ethyl ester, 4-(1,1-dioxo-2,3-dihydro-1H-1.lambda.(6)-thiophen-3-ylamino)-      | 41.455 | 2683   | 0.245 |
| Total compounds (%) |                                                                                              | Total  | 94.367 |       |

<sup>a</sup>Compounds listed according to RI

<sup>b</sup>RI (from literature)

**Table S3.** Chemical composition, retention indices, and percentage composition of the chloroform extract of *Mentha piperita*

| Pic | Compound <sup>a</sup>                                         | TR     | RI <sup>b</sup> | (%)   |
|-----|---------------------------------------------------------------|--------|-----------------|-------|
| 1   | 1,8-Cineole                                                   | 7.158  | 1023            | 0.715 |
| 2   | Isopulegone                                                   | 9.524  | 1159            | 4.487 |
| 3   | 3-Nitro-4-(2,2,3,3,4,4,5,5-octafluoro-pentyloxy)-benzoic acid | 9.736  | 1676            | 0.657 |
| 4   | Pulegone                                                      | 10.684 | 1216            | 2.329 |
| 5   | 2-Furanmethanol                                               | 10.867 | 819             | 1.728 |



|    |                                                                                                                                            |        |       |       |
|----|--------------------------------------------------------------------------------------------------------------------------------------------|--------|-------|-------|
| 6  | 5-Bromo-7-methylisatin                                                                                                                     | 11.170 | 1814  | 1.204 |
| 7  | 8H-5,12b-(Iminoethano)-1H-phenanthro[3,2-d][1,3]dioxin, 2,3,4,4a,5,6-hexahydro-15-methyl-, [4aR-(4a $\alpha$ ,5 $\alpha$ ,12b $\alpha$ )]- | 12.490 | 2277  | 1.582 |
| 8  | 3-Methoxy-2-phenylcinchoninamide                                                                                                           | 14.902 | 2624  | 0.935 |
| 9  | 3,5-Dodecadiyne, 2-methyl-                                                                                                                 | 15.222 | 1284  | 2.218 |
| 10 | Benz[c]oxane-1,3-dione, 4-(2-furfurylideno)-                                                                                               | 15.314 | 2170  | 0.918 |
| 11 | 1-Cyclohexene-1-methanol                                                                                                                   | 19.286 | 1732  | 2.551 |
| 12 | Imidazoquinoline                                                                                                                           | 20.995 | 4792  | 7.767 |
| 13 | Decyl disulfide                                                                                                                            | 21.441 | 2511  | 1.534 |
| 14 | 7-Chloro-1-[heptylimino]-1,3,4,10-tetrahydro-10-hydroxy-3-[4-(trifluoromethyl)phenyl]-9(2H)-acridone                                       | 22.235 | 3563  | 0.759 |
| 15 | Methyl 2-chloro-3-methylbutanoate                                                                                                          | 24.053 | 862   | 1.133 |
| 16 | Acetamide, 2-(adamantan-1-yl)-N-(1-adamantan-1-ylethyl)-                                                                                   | 25.127 | 2545  | 0.686 |
| 17 | Sarcosine, N-(cyclohexylcarbonyl)-, dodecyl ester                                                                                          | 25.339 | 2640  | 1.151 |
| 18 | Corynan-17-ol, 18,19-didehydro-10-methoxy-                                                                                                 | 26.590 | 2667  | 1.732 |
| 19 | 15,19-Dimethylpentatriacontane                                                                                                             | 26.756 | 3571  | 1.811 |
| 20 | 5H-Isoindolo[1,2-b][3]benzazepin-5-one, 7,8,13,13a-tetrahydro-10-hydroxy-3,4,12-trimethoxy-                                                | 27.351 | 2920  | 3.177 |
| 21 | Fluphenazine enanthate                                                                                                                     | 27.922 | 3801  | 3.368 |
| 22 | 18-Pentatriacontanone                                                                                                                      | 28.231 | 3636  | 3.800 |
| 23 | Ergosterol                                                                                                                                 | 28.637 | 2650  | 1.840 |
| 24 | 5-Methyltricosane                                                                                                                          | 29.140 | 2343  | 1.733 |
| 25 | 2,3,5,6-Tetrafluorophenyl isothiocyanate                                                                                                   | 29.311 | 1143  | 0.753 |
| 26 | Eicosane                                                                                                                                   | 29.757 | 345.2 | 1.686 |
| 27 | Tridentochinon acetate                                                                                                                     | 29.888 | 3529  | 0.883 |
| 28 | Itaconamide                                                                                                                                | 30.191 | 1304  | 2.786 |
| 29 | Aminoglutethimide, N,N,N,O-tetrakis(trimethylsilyl) deriv.                                                                                 | 30.837 | 2692  | 0.741 |
| 30 | D-Lysergic acid monoethylamide                                                                                                             | 30.911 | 2559  | 1.248 |
| 31 | Betamethasone dipropionate                                                                                                                 | 31.100 | 3331  | 2.105 |
| 32 | Phosphonic acid, [[3,5-bis(1,1-dimethylethyl)-4-hydroxyphenyl]methyl]-, diethyl ester                                                      | 31.774 | 2181  | 1.903 |
| 33 | N,N-Dimethyl-N'-(10-propyl-10H-acridin-9-ylidene)-benzene-1,4-diamine                                                                      | 32.083 | 3053  | 1.665 |
| 34 | 2,3,7,8,12,13,17,18-Octaethyl-21H,23H-porphin                                                                                              | 32.249 | 4273  | 0.440 |
| 35 | Cholestan-3-one, 2-(1-methylethyl)-, (2 $\alpha$ ,5 $\alpha$ )-                                                                            | 32.717 | 2765  | 0.294 |

|                     |                                                                                                                                 |        |      |       |
|---------------------|---------------------------------------------------------------------------------------------------------------------------------|--------|------|-------|
| <b>36</b>           | Cholestan-3-one, 2-(dimethylamino)-, (2 $\beta$ ,5 $\alpha$ )-                                                                  | 33.523 | 2779 | 0.305 |
| <b>37</b>           | Isomenthon                                                                                                                      | 34.169 | 1146 | 1.451 |
| <b>38</b>           | Indolo[2,3-a]naphtho[1,2-c]cyclopenten-3(8H)-one, 1,2,4,4a,5,6,6a,7,12c,12d-decahydro-12c,12d-dimethyl-4-(4-methyl-2-pentenyl)- | 34.369 | 2954 | 0.996 |
| <b>39</b>           | Methyl (13E)-6-(methoxyimino)-9,11,15-trihydroxy-prost-13-en-1-oate, 3TMS derivative                                            | 35.512 | 3368 | 1.484 |
| <b>40</b>           | 1,3,5-Triethyl-1-(ethylbutoxysiloxy)cyclotrisiloxane                                                                            | 35.815 | 1585 | 0.611 |
| <b>41</b>           | 2-(4-Chlorophenyl)-5,7-dimethylimidazo[1,2-a]pyridine-8-carbonitrile                                                            | 39.302 | 2385 | 0.844 |
| Total compounds (%) |                                                                                                                                 | Total  |      | 70.01 |

<sup>a</sup>Compounds listed according to RI

<sup>b</sup>RI (from literature)

**Table S4.** Chemical composition, retention indices, and percentage composition of hexane extract of *Mentha piperita*

| <b>Pic</b> | <b>Compound<sup>a</sup></b>                                                        | <b>TR</b> | <b>RI<sup>b</sup></b> | <b>(%)</b> |
|------------|------------------------------------------------------------------------------------|-----------|-----------------------|------------|
| 1          | Fluphenazine                                                                       | 3.717     | 3045                  | 0.087      |
| 2          | 6-Chloroquinoxalino[2,3-b]cholestane                                               | 4.911     | 3563                  | 0.159      |
| 4          | Pyrimidine, 2,4-dimethyl-                                                          | 7.163     | 894                   | 0.485      |
| 5          | Silane, diethylbis(pentafluorophenyl)-                                             | 7.906     | 1424                  | 0.371      |
| 6          | l-Menthone                                                                         | 9.375     | 1148                  | 6.976      |
| 7          | Phenol, 4-nitro-                                                                   | 10.369    | 1527.2                | 0.329      |
| 8          | Pulegone                                                                           | 10.690    | 1216                  | 3.620      |
| 9          | Methylethylmaleimide                                                               | 10.872    | 1280.6                | 1.382      |
| 10         | 3-Hydroxyiminocyclopentan-2-one-1-carboxylic acid                                  | 10.970    | 1521                  | 0.315      |
| 11         | <i>p</i> -Cymene, 2-chloro-                                                        | 11.461    | 1221                  | 0.840      |
| 12         | 5-Diazouracil                                                                      | 12.478    | 1448                  | 1.112      |
| 13         | [1,2,4]Triazolo[4,3-a]quinoxaline, 1,4-dimethyl-                                   | 13.536    | 1748                  | 0.480      |
| 14         | Cyclohexene,1-propyl-                                                              | 14.445    | 990                   | 0.592      |
| 15         | 5H-[1,2,4]Triazolo[3,4-b][1,3]thiazin-5-one, 7-(4-methoxyphenyl)-                  | 15.228    | 2285                  | 0.757      |
| 16         | 2,2,4-Tri(4-morpholinyl)-6-(trichloromethyl)-1,3,5,2.lambda.<5>-triazaphosphinine  | 16.445    | 3384                  | 0.390      |
| 17         | 30-Norlupan-28-oic acid, 3-hydroxy-21-methoxy-20-oxo-, methyl ester, (3 $\beta$ )- | 17.834    | 3321                  | 0.476      |
| 18         | Stigmast-7-en-3-ol, acetate, (3 $\beta$ ,5 $\alpha$ )-                             | 17.971    | 2871                  | 0.212      |
| 19         | 5,6-Dimethoxyphthalaldehydic acid                                                  | 18.508    | 1830                  | 0.286      |
| 20         | Palmitinic acid                                                                    | 19.308    | 1942                  | 2.623      |

|    |                                                                                                                    |        |        |        |
|----|--------------------------------------------------------------------------------------------------------------------|--------|--------|--------|
| 21 | 2-Acetylpyridine 4,4-dibenzylthiosemicarbazone                                                                     | 19.497 | 3358   | 0.230  |
| 22 | Genistein                                                                                                          | 20.446 | 2634   | 0.468  |
| 23 | <i>n</i> -Propyl linolenate                                                                                        | 20.509 | 2300   | 0.499  |
| 24 | Linolenic acid                                                                                                     | 20.714 | 2134   | 19.607 |
| 25 | Ethanone, 1-[4-(chloromethyl)-2-(4-methylphenyl)-5-thiazolyl]-                                                     | 21.406 | 2159   | 0.328  |
| 26 | 4',6-Dichlorothioflavone                                                                                           | 22.235 | 2484   | 0.350  |
| 27 | Epiandrosterone                                                                                                    | 22.469 | 2128   | 0.627  |
| 28 | Ethanol, 2,2,2-trichloro-                                                                                          | 22.806 | 850    | 0.749  |
| 29 | 2,3,3',4',5,6-Hexachloro-1,1'-biphenyl                                                                             | 22.995 | 2322.5 | 0.668  |
| 30 | Cholest-5-ene, 3-ethoxy-, (3 $\beta$ )-                                                                            | 23.246 | 2645   | 0.976  |
| 31 | Prostaglandin F1 $\alpha$ -trimethylsilyl methyl ester                                                             | 23.458 | 3000   | 0.361  |
| 32 | Pirenzepine, 8-sulfamoyl-                                                                                          | 23.458 | 3827   | 0.328  |
| 33 | Octanoic acid, 6-hydroxy-8-methoxy-, $\epsilon$ -lactone                                                           | 23.829 | 1401   | 0.582  |
| 34 | 7H-Furo[3,2-g][1]benzopyran-7-one, 9-[2,3-bis(acetyloxy)-4-(2,5-dihydro-4-methyl-5-oxo-2-furanyl)-3-methylbutoxy]- | 24.195 | 3719   | 0.547  |
| 35 | <i>n</i> -Butoxycarbonyldemecolcine                                                                                | 24.390 | 3619   | 0.564  |
| 36 | 2-Docosenoic acid, 2,4,21,21-tetramethyl-, methyl ester, (E)-                                                      | 24.595 | 2709   | 0.567  |
| 37 | Chol-8(14)-en-24-ol                                                                                                | 24.858 | 2445   | 0.509  |
| 38 | Ethyl 6-bromo-7-hydroxy-2-ureidobenzo[b]thiophene-3-carboxylate                                                    | 24.932 | 2863   | 0.482  |
| 39 | Nandrolone decanoate                                                                                               | 25.064 | 3000   | 0.287  |
| 40 | <i>n</i> -Tricosane                                                                                                | 25.344 | 388.7  | 0.851  |
| 41 | Chenodiol                                                                                                          | 25.613 | 2896   | 0.416  |
| 42 | 7-Hydroxytomatidine, O,O,N-triacetate                                                                              | 26.058 | 3660   | 0.562  |
| 43 | Cyclopropanecarbonitrile, 1,2-bis(p-nitrophenyl)-                                                                  | 26.493 | 2739   | 0.434  |
| 44 | <i>n</i> -tetracosane                                                                                              | 26.761 | 402.5  | 2.274  |
| 45 | Estra-1,3,5(10)-trien-15-one, 3,17-bis(acetyloxy)-, 15-(O-methyloxime), (17 $\beta$ )-                             | 27.253 | 2837   | 0.460  |
| 46 | Heneicosane, 3-methyl-                                                                                             | 27.447 | 2182   | 0.966  |
| 47 | 5,8-Quinolinedione, 7-(heptadecylthio)-6-hydroxy-                                                                  | 27.922 | 3545   | 0.746  |
| 48 | Benzaldehyde, 3,4-methylenedioxy-2-nitro-, thiosemicarbazone                                                       | 28.019 | 2676   | 0.290  |
| 49 | 4,8-Dimethylheptacosne                                                                                             | 28.236 | 2776   | 2.260  |
| 50 | Cyclodecasiloxane, eicosamethyl-                                                                                   | 28.476 | 2067   | 0.184  |
| 51 | Benzoic acid, 2,5-dichloro-3-hydroxy-6-methoxy-                                                                    | 28.539 | 1920   | 0.608  |
| 52 | Cyclopentanecarboxamide, 3-ethenyl-2-(3-pentenylidene)-N-phenyl-, [1 $\alpha$ ,2Z(E),3 $\alpha$ ]-                 | 28.768 | 2375   | 0.592  |

|    |                                                                                                                                                    |        |       |       |
|----|----------------------------------------------------------------------------------------------------------------------------------------------------|--------|-------|-------|
| 53 | Equilin                                                                                                                                            | 28.870 | 2163  | 0.706 |
| 54 | 4-[2-(2,5-Dioxo-pyrrolidin-1-yloxy carbonyl)-cyclohexanecarbonyl]-piperazine-1-carboxylic acid tert-butyl ester                                    | 29.128 | 3421  | 1.457 |
| 55 | Zeranol, tris(trimethylsilyl) ether                                                                                                                | 29.962 | 3254  | 0.498 |
| 56 | <i>n</i> -Eicosane                                                                                                                                 | 30.214 | 345.2 | 3.701 |
| 57 | Androst-5-en-7-one, 3,17-bis(acetyloxy)-19-(methoxymethoxy)-4,4-dimethyl-, (3 $\beta$ ,17 $\beta$ )-                                               | 30.516 | 3092  | 0.375 |
| 58 | Thiocolchicine, 3,N-diethoxycarbonyl-3-demethyl-N-deacetyl-                                                                                        | 30.625 | 3862  | 0.495 |
| 59 | Isonipecotic acid, N-(2,4,5-trifluoro-3-methoxybenzoyl)-, dodecyl ester                                                                            | 30.762 | 3356  | 0.231 |
| 60 | Butyric acid, 4-(4-chloro-5-methyl -3-nitropyrazol-1-yl)-                                                                                          | 31.088 | 1997  | 2.499 |
| 61 | 1h-Pyrrole-3,4-diacetic acid, 2-acetoxymethyl-5-methoxycarbonyl-, dimethyl ester                                                                   | 31.214 | 2433  | 0.165 |
| 62 | 4-Nitro-4'-chlorodiphenylsulfoxide                                                                                                                 | 31.488 | 2347  | 2.607 |
| 63 | 1,1,1,5,7,7,7-Heptamethyl-3,3,5-tris (trimethylsiloxy) tetrasiloxane                                                                               | 31.768 | 1437  | 1.476 |
| 64 | 5-Amino-2-(4-chlorophenyl)-7-methyl-6-indolizinecarbonitrile                                                                                       | 31.962 | 2491  | 0.443 |
| 65 | 1,4-Dioxa-7,18-diazacycloeicosane-6,19-dione, 7,18-dihexyl-                                                                                        | 32.214 | 4011  | 1.136 |
| 66 | Octadecanoic acid, octyl ester                                                                                                                     | 32.334 | 2773  | 1.316 |
| 67 | Cyano[(1H-tetrazol-5-yl)hydrazono]acetic acid, ethyl ester                                                                                         | 32.740 | 2286  | 1.391 |
| 68 | Dodecanoic acid, 2,2,3,3,4,4,5,5,6,6,7,7-dodecafluoroheptyl ester                                                                                  | 32.968 | 1265  | 1.568 |
| 69 | D-Gluconic acid, $\delta$ -lactone                                                                                                                 | 33.146 | 1813  | 0.380 |
| 70 | $\beta$ -Tocopherol, TMS derivative                                                                                                                | 33.243 | 2987  | 0.799 |
| 71 | 1,1'-Biphenyl, 2,2',3,3',5,5',6,6'-octachloro-                                                                                                     | 33.574 | 2381  | 0.588 |
| 72 | Griseoviridin                                                                                                                                      | 33.666 | 4195  | 0.178 |
| 73 | Cholestan-3-one, oxime, (5 $\alpha$ )-                                                                                                             | 33.740 | 2730  | 0.281 |
| 74 | Acetic acid, 17-(4-chloro-5-methoxy-1,5-dimethylhexyl)-4,4,10,13,14-pentamethyl-2,3,4,5,6,7,10,11,12,13,14,15,16,17 -tetradecahydro-1-phenanthryl- | 33.860 | 3268  | 0.672 |
| 75 | 6-Chloro-12H-tetrachlorodibenzo[d,g][1,3,2]phosphorin-6-sulfide                                                                                    | 34.014 | 2883  | 0.313 |
| 76 | 1,2-Difluoro-1,2,3,3,4,4,5,5,6,6-decamethylhexasilinane                                                                                            | 34.249 | 334   | 0.639 |
| 77 | 2,3,4-Trihydroxybenzoic acid, 4TMS                                                                                                                 | 34.397 | 1932  | 0.644 |
| 78 | 4(1H)-Pteridinone, 5,6,7,8-tetrahydro-6-methyl-                                                                                                    | 34.597 | 1830  | 0.443 |
| 79 | Spiro[9,9]difluorene, 2,2'-(2,5,8,11-tetraoxadodecane-1,12-diyl)-                                                                                  | 34.694 | 4060  | 0.279 |
| 80 | 2,5-Dibromonitrobenzene                                                                                                                            | 34.895 | 1715  | 0.834 |
| 81 | 4"-Dehydroxy-2",3',3",4',5,6",7-hepta-O-methylisoorientin                                                                                          | 35.083 | 3977  | 0.414 |
| 82 | Phosphine, 1,2-ethenediylbis[diphenyl-, (E)-                                                                                                       | 35.335 | 3173  | 0.399 |

|                     |                                                                                                      |        |        |       |
|---------------------|------------------------------------------------------------------------------------------------------|--------|--------|-------|
| 83                  | Furfurylideniminosulphur pentafluoride                                                               | 35.752 | 966    | 0.652 |
| 84                  | allantoin                                                                                            | 36.981 | 1595   | 1.302 |
| 85                  | Silane,diphenyl-bis -[2-(1,3,5,5,7,7-heptamethyl-2,4,6,8-tetraoxy-1,3,5,7-tetrasilacyclooctyl)ethyl] | 37.232 | 3087   | 0.190 |
| Total compounds (%) |                                                                                                      | Total  | 89.935 |       |

<sup>a</sup>Compounds listed according to RI

<sup>b</sup>RI (from literature)
